# Supplementary material for: Beyond the obvious: a realistic and holistic approach reveals multiple disorders caused by reduced-risk pesticides on individuals and colonies of bumble bees
Source: Research Square preprint supplement (doi:10.21203/rs.3.rs-8311248/v1), 2026-01-23
Supplement: Supplementary file 1 [file c525fe1b350d60bc9bfed137.docx]

**Supplementary material**


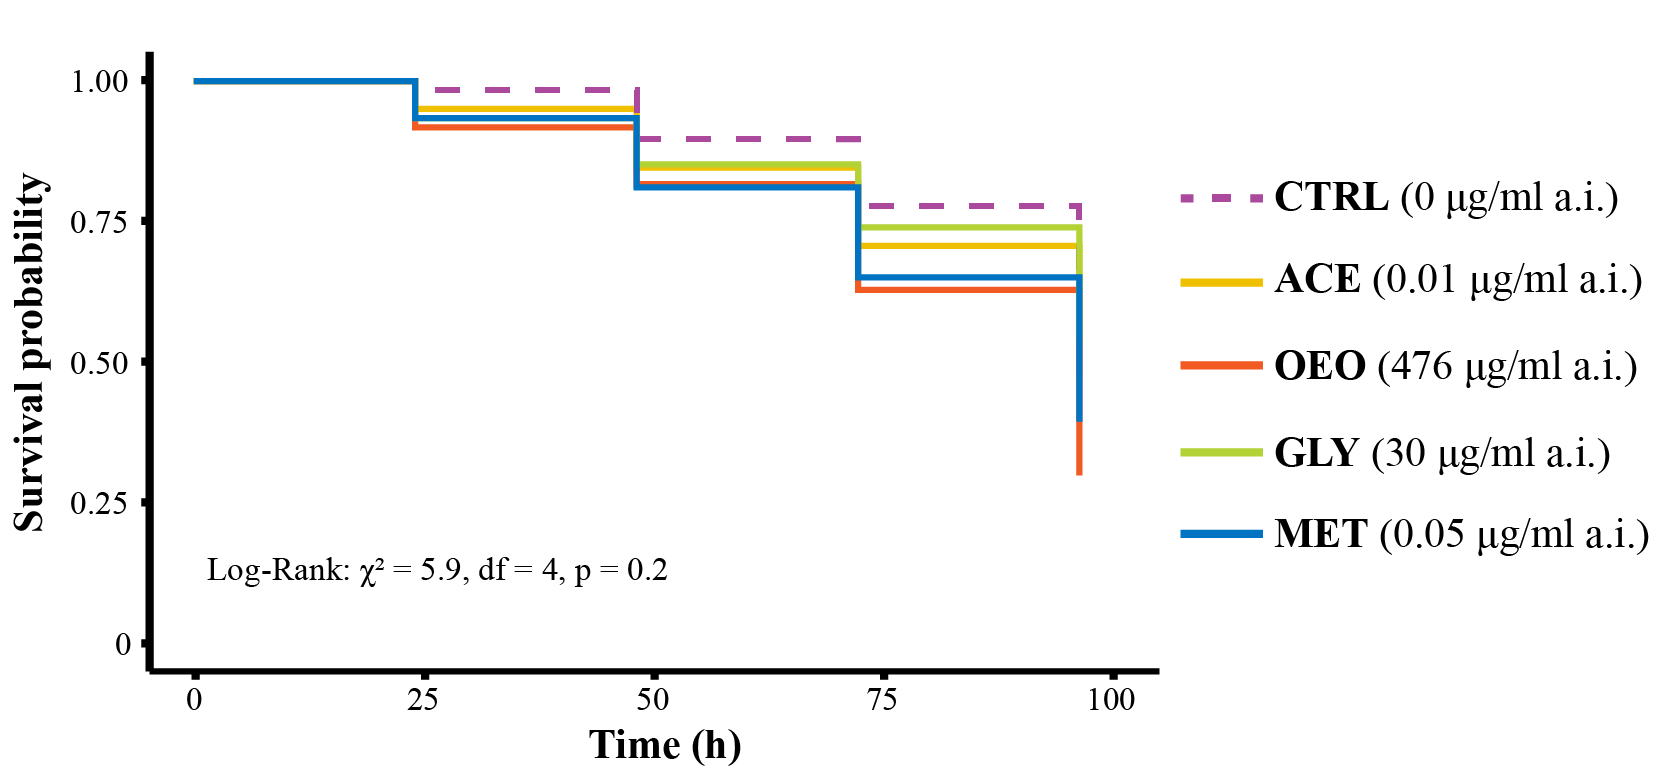


**Fig. S1. Survival probability of *Bombus terrestris* individuals during 96 hours of exposure.** Honey syrup treatments were: (CTRL) uncontaminated (control); (ACE) contaminated with acetamiprid; (OEO) contaminated with sweet orange essential oil; (GLY) contaminated with glyphosate; and (MET) contaminated with metalaxyl-M. Each colony was considered a treatment replicate, with three replicates per treatment, totaling 15 colonies. Five workers were collected from each colony for the individual-level test, totaling 75 individuals observed. There was no significant difference in survival between pesticide-contaminated treatments (ACE, OEO, GLY, and MET) and the control (*p* > 0.05).

**Table S1.** Comparison of walking behaviorparameters between treated and untreated *Bombus terrestris* workers after one week of pesticide exposure at colony and individual levels. Bees were submitted to (CTRL) uncontaminated honey syrup (control); (ACE) honey syrup contaminated with acetamiprid (0.01 μg/ml); (OEO) honey syrup contaminated with sweet orange essential oil (476 μg/ml); (GLY) honey syrup contaminated with glyphosate (30 μg/ml); and (MET) honey syrup contaminated with metalaxyl-M (0.05 μg/ml). The values of the Dunnett’s multiple comparison test refers to the contrasts between the pesticide treatments (ACE, OEO, GLY, and MET) and the CTRL. P values lower than 0.05 indicate significant difference between the pesticide treatment (ACE, OEO, GLY, and MET) and the CTRL. Positive t-ratios indicate that the pesticide treatment was higher than the CTRL, while negative t-ratios indicate the opposite.

| **Behavioral parameter** | **Pesticide treatment** | **Social level of exposure** | **Model distribution**  **fitted** | **Dunnett's multiple comparison test** | | | | |
| --- | --- | --- | --- | --- | --- | --- | --- | --- |
| **Estimate** | **SE** | **DF** | **t-ratio** | **p value** |
| Distance walked | ACE | Colony | NO | -365 | 134 | 68 | -2.726 | 0.029 * |
|  |  | Individual | NO | -40.7 | 199 | 41 | -0.204 | 0.992 |
|  | OEO | Colony | NO | -801 | 134 | 68 | -5.981 | <0.001 * |
|  |  | Individual | NO | -326.2 | 220 | 41 | -1.485 | 0.391 |
|  | GLY | Colony | NO | -413 | 134 | 68 | -3.087 | 0.011 * |
|  |  | Individual | NO | -21.1 | 195 | 41 | -0.108 | 0.998 |
|  | MET | Colony | NO | -631 | 134 | 68 | -4.715 | <0.001 * |
|  |  | Individual | NO | 73.9 | 205 | 41 | 0.361 | 0.968 |
| Mean walking speed | ACE | Colony | NO | -0.608 | 0.223 | 68 | -2.724 | 0.029 * |
|  |  | Individual | NO | -0.0676 | 0.332 | 41 | -0.204 | 0.992 |
|  | OEO | Colony | NO | -1.334 | 0.223 | 68 | -5.974 | <0.001 * |
|  |  | Individual | NO | -0.543 | 0.366 | 41 | -1.485 | 0.391 |
|  | GLY | Colony | NO | -0.689 | 0.223 | 68 | -3.085 | 0.011 * |
|  |  | Individual | NO | -0.035 | 0.324 | 41 | -0.109 | 0.998 |
|  | MET | Colony | NO | -1.052 | 0.223 | 68 | -4.710 | <0.001 * |
|  |  | Individual | NO | 0.123 | 0.341 | 41 | 0.362 | 0.968 |
| Meandering | ACE | Colony | BCCG | 88.4 | 37.9 | 67 | 2.331 | 0.077 |
|  |  | Individual | NO | 286.7 | 290 | 41 | 0.987 | 0.695 |
|  | OEO | Colony | BCCG | 353.8 | 81.2 | 67 | 4.359 | <0.001 * |
|  |  | Individual | NO | 283.2 | 320 | 41 | 0.886 | 0.755 |
|  | GLY | Colony | BCCG | 75.6 | 36.5 | 67 | 2.068 | 0.137 |
|  |  | Individual | NO | 19.3 | 284 | 41 | 0.068 | 0.999 |
|  | MET | Colony | BCCG | 260.1 | 71.2 | 67 | 3.652 | 0.002 * |
|  |  | Individual | NO | 104.8 | 298 | 41 | 0.351 | 0.97 |
| Resting time | ACE | Colony | NO | -7.01 | 9.21 | 68 | 0.762 | 0.822 |
|  |  | Individual | NO | -6.85 | 17.1 | 41 | -0.4 | 0.959 |
|  | OEO | Colony | NO | 11.90 | 9.21 | 68 | 1.293 | 0.501 |
|  |  | Individual | NO | 20.56 | 18.9 | 41 | 1.088 | 0.633 |
|  | GLY | Colony | NO | -8.76 | 9.21 | 68 | -0.952 | 0.715 |
|  |  | Individual | NO | 4.49 | 16.8 | 41 | 0.268 | 0.984 |
|  | MET | Colony | NO | 19.51 | 9.21 | 68 | 2.119 | 0.123 |
|  |  | Individual | NO | -10.91 | 17.6 | 41 | -0.619 | 0.888 |
| Mean movement time | ACE | Colony | NO | -7.174 | 8.36 | 68 | -0.859 | 0.77 |
|  |  | Individual | NO | -7.00 | 17.5 | 41 | -0.4 | 0.959 |
|  | OEO | Colony | NO | -12.01 | 8.36 | 68 | -1.437 | 0.413 |
|  |  | Individual | NO | -13.85 | 19.3 | 41 | -0.718 | 0.844 |
|  | GLY | Colony | NO | 3.986 | 8.36 | 68 | 0.477 | 0.938 |
|  |  | Individual | NO | -5.61 | 17.1 | 41 | -0.328 | 0.974 |
|  | MET | Colony | NO | -12.73 | 8.36 | 68 | -1.523 | 0.365 |
|  |  | Individual | NO | -8.26 | 18.0 | 41 | -0.46 | 0.944 |
| Mean fast time | ACE | Colony | NO | 4.51 | 2.77 | 68 | 1.627 | 0.31 |
|  |  | Individual | NO | 4.83 | 5.30 | 41 | 0.911 | 0.741 |
|  | OEO | Colony | NO | -11.01 | 2.77 | 68 | -3.971 | <0.001 * |
|  |  | Individual | NO | -4.15 | 5.84 | 41 | -0.711 | 0.847 |
|  | GLY | Colony | NO | -2.88 | 2.77 | 68 | -1.039 | 0.661 |
|  |  | Individual | NO | 2.29 | 5.17 | 41 | 0.443 | 0.948 |
|  | MET | Colony | NO | -3.78 | 2.77 | 68 | -1.364 | 0.457 |
|  |  | Individual | NO | 15.01 | 5.44 | 41 | 2.758 | 0.031 * |
| Group density network | ACE | Colony | BCCG | -156.1 | 84.9 | 53 | -1.839 | 0.217 |
|  |  | Individual | NO | 83.4 | 382 | 7 | 0.218 | 0.981 |
|  | OEO | Colony | BCCG | -175.1 | 82.9 | 53 | -2.114 | 0.127 |
|  |  | Individual | NO | -130.2 | 382 | 7 | -0.341 | 0.953 |
|  | GLY | Colony | BCCG | -75.1 | 96.2 | 53 | -0.78 | 0.813 |
|  |  | Individual | NO | -469.7 | 382 | 7 | -1.229 | 0.514 |
|  | MET | Colony | BCCG | -143.6 | 84.0 | 53 | -1.709 | 0.273 |

NO = Normal; BCCG = Box-Cox-Cole-Green.

*Significant difference between the pesticide treatment and the control.

**Table S2.** Effects of social context (colony vs. individual) and pesticide exposure on *Bombus terrestris* walking behavior. Bees were submitted to (CTRL) uncontaminated honey syrup (control); (ACE) honey syrup contaminated with acetamiprid (0.01 μg/ml); (OEO) honey syrup contaminated with sweet orange essential oil (476 μg/ml); (GLY) honey syrup contaminated with glyphosate (30 μg/ml); and (MET) honey syrup contaminated with metalaxyl-M (0.05 μg/ml). The values of the Dunnett’s multiple comparison test refers to the contrasts between colony and individual exposure within a treatment. P values lower than 0.05 indicate significant difference between individual and colony exposure levels.

| **Behavioral Parameter** | **Treatment** | **Test (t)** | **df** | **p-value** | **Significant?** | **Direction of Effect (Colony vs Individual)** |
| --- | --- | --- | --- | --- | --- | --- |
| **Distance Walked (DW)** | CTRL | t = 4.758 | 336 | < 0.001 | Yes | Higher in Colony |
|  | GLY | t = 2.313 | 336 | 0.021 | Yes | Higher in Colony |
|  | ACE | t = 0.843 | 336 | 0.400 | No | - |
|  | OEO | t = 1.556 | 336 | 0.121 | No | - |
|  | MET | t = -0.569 | 336 | 0.569 | No | - |
| **Mean Speed (MS)** | CTRL | t = 4.534 | 336 | < 0.001 | Yes | Higher in Colony |
|  | GLY | t = 2.332 | 336 | 0.020 | Yes | Higher in Colony |
|  | ACE | t = 0.865 | 336 | 0.387 | No | - |
|  | OEO | t = 1.545 | 336 | 0.123 | No | - |
|  | MET | t = -0.539 | 336 | 0.590 | No | - |
| **Meandering (ME)** | CTRL | t = -3.328 | 336 | 0.001 | Yes | Lower in Colony |
|  | GLY | t = -2.304 | 336 | 0.022 | Yes | Lower in Colony |
|  | ACE | t = -1.512 | 336 | 0.131 | No | - |
|  | OEO | t = -1.785 | 336 | 0.075 | No | - |
|  | MET | t = 0.318 | 336 | 0.751 | No | - |
| **Resting Time (RT)** | CTRL | t = -1.178 | 336 | 0.240 | No | - |
|  | GLY | t = -3.429 | 336 | < 0.001 | Yes | Lower in Colony |
|  | ACE | t = -0.523 | 336 | 0.601 | No | - |
|  | OEO | t = -0.869 | 336 | 0.386 | No | - |
|  | MET | t = 0.915 | 336 | 0.361 | No | - |
| **Mean Movement Time (MT)** | CTRL | t = 1.106 | 336 | 0.269 | No | - |
|  | GLY | t = 2.362 | 336 | 0.019 | Yes | Higher in Colony |
|  | ACE | t = 1.425 | 336 | 0.155 | No | - |
|  | OEO | t = -0.098 | 336 | 0.922 | No | - |
|  | MET | t = 0.672 | 336 | 0.502 | No | - |
| **Mean Fast Time (MF)** | CTRL | t = 4.43 | 336 | < 0.001 | Yes | Higher in Colony |
|  | GLY | t = 2.738 | 336 | 0.006 | Yes | Higher in Colony |
|  | ACE | t = 1.831 | 336 | 0.068 | No | - |
|  | OEO | t = 1.326 | 336 | 0.186 | No | - |
|  | MET | t = -2.352 | 336 | 0.019 | Yes | Higher in Individual |

**Table S3.** Walking behavior of *Bombus terrestris* workers from colonies exposed to different pesticide treatments over four weeks. Treatments are: (CTRL) uncontaminated honey syrup (control); (ACE) honey syrup contaminated with acetamiprid (0.01 μg/ml); (OEO) honey syrup contaminated with sweet orange essential oil (476 μg/ml); (GLY) honey syrup contaminated with glyphosate (30 μg/ml); and (MET) honey syrup contaminated with metalaxyl-M (0.05 μg/ml). P values lower than 0.05 indicate significant effect of time on the behavior within a treatment.

| **Behavioral Parameter** | **Overall Effect of Weeks?** | **Treatment** | **Test (t) or χ²** | **df** | **p-value** | **Direction of Change Over Time** |
| --- | --- | --- | --- | --- | --- | --- |
| **Distance Walked (DW)** | Yes (χ² = 5.961, p = 0.015) | CTRL | t = 1.045 | 289 | 0.297 | - |
|  |  | ACE | t = -0.673 | 289 | 0.502 | - |
|  |  | OEO | t = 1.909 | 289 | 0.057 | - |
|  |  | GLY | t = 1.015 | 289 | 0.311 | - |
|  |  | MET | t = 2.035 | 289 | 0.043* | Increased |
| **Mean Speed (MS)** | Yes (χ² = 4.982, p = 0.026) | CTRL | t = 0.379 | 289 | 0.705 | - |
|  |  | ACE | t = -0.680 | 289 | 0.497 | - |
|  |  | OEO | t = 1.796 | 289 | 0.074 | - |
|  |  | GLY | t = 0.992 | 289 | 0.322 | - |
|  |  | MET | t = 2.053 | 289 | 0.041* | Increased |
| **Meandering (ME)** | No (χ² = 3.657, p = 0.056) | All | - | - | > 0.05 | - |
| **Resting Time (RT)** | Yes (χ² = 20.581, p < 0.001) | CTRL | t = -1.013 | 289 | 0.312 | - |
|  |  | ACE | t = -0.692 | 289 | 0.489 | - |
|  |  | OEO | t = -2.637 | 289 | 0.009* | Decreased |
|  |  | GLY | t = -2.560 | 289 | 0.011* | Decreased |
|  |  | MET | t = -5.307 | 289 | < 0.001* | Decreased |
| **Mean Movement Time (MT)** | Yes (χ² = 9.232, p < 0.001) | CTRL | t = 0.774 | 289 | 0.439 | - |
|  |  | ACE | t = 1.429 | 289 | 0.154 | - |
|  |  | OEO | t = 3.528 | 289 | < 0.001* | Increased |
|  |  | GLY | t = -0.114 | 289 | 0.909 | - |
|  |  | MET | t = 1.327 | 289 | 0.185 | - |
| **Mean Fast Time (MF)** | Yes (χ² = 4.337, p = 0.037) | CTRL | t = 1.077 | 289 | 0.282 | - |
|  |  | ACE | t = -2.513 | 289 | 0.012* | Decreased |
|  |  | OEO | t = 2.027 | 289 | 0.044* | Increased |
|  |  | GLY | t = 1.722 | 289 | 0.086 | - |
|  |  | MET | t = 2.474 | 289 | 0.014* | Increased |
| **Group Density Network (GN)** | No (χ² = 2.022, p = 0.155) | All | - | - | > 0.05 | - |

*Significant effect of time on the behavior within a treatment.
